# Supplementary material for: Pandemic and mental health of the front-line healthcare workers: a review and implications in the Indian context amidst COVID-19
Source: PubMed Central journal article supplement — Gen Psychiatr. 2020 Aug 7;33(5):e100284. doi: 10.1136/gpsych-2020-100284 (PMC7415074; doi:10.1136/gpsych-2020-100284), 2020-08-07
Supplement: gpsych-2020-100284supp001.pdf [file gpsych-2020-100284supp001.pdf]

Supplementary file-1

**PubMed search with MeSH terms and keywords**

((((((((((((((((((((((("epidemics"[MeSH Terms]) OR "infection") OR "outbreak/epidemic")) OR "severe acute respiratory syndrome"[MeSH Terms]) OR "ebolavirus"[MeSH Terms]) OR "middle east respiratory syndrome coronavirus"[MeSH Terms])) OR "covid19") OR "h1n1/09")))))))) NOT "acquired immunodeficiency syndrome"[MeSH Terms]) NOT "hiv"[MeSH Terms])) AND (((((((("health care providers") OR "health professionals/care") OR "nurse") OR "para medical workers")))) OR "frontline health"\*)) NOT "acquired immunodeficiency syndrome"[MeSH Terms]) NOT "hiv"[MeSH Terms])) AND (((((((("mental health"[MeSH Terms]) OR "stress, psychological"[MeSH Terms]) OR "anxiety"[MeSH Terms]) OR "fear"[MeSH Terms]) OR "depression"[MeSH Terms]) OR "insomnia/anxiety")))))-99 articles were found to be relevant.
